# Supplementary material
Source: Research Square preprint supplement (doi:10.21203/rs.3.rs-9505324/v1)
Supplement: Supplementary file 1 [file 197797216ef58ce0bd89ca18.docx]

**Table 1. Clinical characteristics of patients with intra-neurofibroma hemorrhage**

Background/Phenotype Number of cases

Genetic status

Generalized/Constitutional 7

Mosaic 2

DNB classification

D4N0B0 1

D4N0B1 1

D4N0B2 5

D4N1B2 1

D4N2B2 1

Neurofibroma type with hemorrhage

Plexiform type 9

Cutaneous type 0

Site of neurofibroma with hemorrhage

Trunk 4

Head/neck 3

Leg 2

Time until consultation

Several hours 7

Two days 1

Four days 1

**Table 2. Clinical characteristics and imaging findings at presentation**

Subjective and objective findings Number of cases

Subjective symptoms

Pain alone 4

Swelling alone 2

Concurrent pain and swelling 3

Awareness of external forces as a catalyst

Absence 7

Presence 1

No data 1

Systolic blood pressure

<90 mmHg 0

≥90 mmHg 9

Mean arterial pressure

<65 mmHg 0

≥65 mmHg 9

Body temperature

<37.5℃ 7

≥37.5℃ 2

Active bleeding findings on contrast CT

Positive 4

Negative 5

Aneurysm with hemorrhage in NF on contrast CT

Positive 3

Negative 6

CT, computed tomography; NF, neurofibroma

**Table 3. Estimated blood loss and clinical management in individual patients**

Estimated variables in blood loss Treatment

Case No. Volume (mL) Percentage (%) Transfusion Embolization

#1 831 26.1 − −

#2 871 29.2 − −

#3 123 4.5 − −

#4 1109 42.6 + −

#5 1120 43.0 − +

#6 nd nd − −

#7 1623 46.1 + +

#8 1967 36.6 + −

#9 765 28.2 + −

+, done; −, not done; nd, no data.
